immunosurgery PGCs

1 **TITLE**

2

3 **Effective Cell Immunoablation in Undisrupted Developing Avian Embryos**

4 Maríacruz López-Díaz<sup>a‡</sup>, Julia Buján-Varela<sup>b</sup> and Carlos Cadórniga-Valiño<sup>a</sup>

5

6

---

<sup>a</sup>Instituto Nacional de Investigación y Tecnología Agraria y Alimentaria (INIA). 28040 Madrid - Spain  
<sup>‡</sup>Author for correspondence: (lopez.maria@inia.es )

<sup>b</sup>Departamento de Especialidades Médicas. Universidad de Alcalá de Henares. 28801 Madrid – Spain, mjulia.bujan uah.es.

immunosurgery PGCs

7 **SUMMARY STATEMENT**

8 **An immunosurgery procedure is described that yields an almost complete ablation of**  
9 **primordial germ cells in early developing chick embryos, thus increasing the expected**  
10 **rates of chimerism when foreign PGCs are grafted onto these embryos**

immunosurgery PGCs

11

12 **ABSTRACT**

13 In birds the construction of germline chimeras by grafting exogenous primordial germ cells  
14 (PGCs) during embryonic development is feasible since they migrate to the gonads through  
15 the blood. Up to date, the efficiencies are highly variable, in part dependent on the destruction  
16 of endogenous PGCs in the recipient embryo. We show an almost complete ablation of the  
17 endogenous PGCs in stage X embryos using a baby rabbit serum (BRS), with previous  
18 cellular signaling by specific antibodies (SSEA1). The application of the treatments, either on  
19 epiblast or subgerminally, produced the reduction of the PGCs in the embryos in a dose  
20 dependent manner. No malformations or damages were detected in the treated embryos.  
21 However, subgerminal injection of this cocktail produced a massive cellular destruction in all  
22 embryos. Therefore, sequential application is a selective and effective method to produce  
23 receptor embryos. Nevertheless, it can also be highly destructive if the mixture is applied  
24 locally, this could be useful in the treatment of malignancies.

25

26 **Keywords:** PGCs, immunosurgery, chicken embryos.

27

immunosurgery PGCs

## 28 **INTRODUCTION**

29 Very few studies have been done “in vivo” since 1975 when Solter and Knowles coined the  
30 term of “immunosurgery”. These authors were able to ablate the trophectoderm cells in mouse  
31 embryos by using antibody and complement. In 2007 Chen and Melton by using antibodies  
32 against red blood cells and heterologous guinea pig serum as a source of complement,  
33 achieved successfully isolation of the inner cell mass in human embryos. Also Gerhart et al.  
34 developed an efficient ablation procedure of two epiblast cell types with neuronal and  
35 muscular epitopes by using specific antibodies and baby rabbit serum (BRS) in stage X  
36 chicken embryos (Gerhart et al 2008, 2010).

37

38 On the other hand, in birds it is needed to develop new assisted reproduction procedures since  
39 avian oocytes and embryos are organized as an extremely precise biological structure, the egg.  
40 This complex assembly of oocyte/embryo does not stand freezing as is the case of mammalian  
41 embryos. Every aspect of the fertilized egg (pH of the different compartments, gas  
42 permeability, density relations and floatability, access to the different layers of nutrients, etc)  
43 is finely adjusted (Stern 1991, Lopez-Diaz et al. 2016). However, avian embryo has morpho-  
44 physiological peculiarities which allow the spread of a genotype or a specific lineage from the  
45 precursor cells of sperm and oocytes, the primordial germ cells (PGCs), which can be  
46 cryopreserved ex-situ. This assisted reproduction procedure involves the construction of  
47 germline chimeras by grafting, during embryonic period, PGCs of the desired lineage on a  
48 recipient embryo of a different strain (van de Lavoie 2006).

49

50 The inactivation of the recipient’s germ line has been used as a strategy to improve the degree  
51 of germinal chimerism. For decades, the commonly used methods have been irradiation  
52 (Maeda et al, 1998, Carsience et al, 1993; Kino et al 1997; Speksnijder and Ivarie, 2000; Lia

## immunosurgery PGCs

53 et al, 2001; Nakamura et al, 2012) or administration of cytotoxic agents (Hemsworth &  
54 Jackson 1963; Reynaud 1977; Mozdziak et al 2006; Song et al, 2005; Petite et al 1990;  
55 Bresler et al., 1994; Aige Gil V and Simkiss K 1991, Naito et al. 2015). Both are effective, but  
56 completely unspecific, equally affecting all populations of embryonic cells, damaging the  
57 viability of the recipient embryo. In fact, the results usually achieved have an extremely high  
58 variability in the transmission rates of the grafted germline (2.9-100%), whether the  
59 endogenous PGCs are inactivated (Naito et al. 2015) or not (van de Lavoie 2006, White et al.  
60 2015), this means that the procedure is not under control.

61

62 The origin and migration of avian PGCs have been well characterized (Dubois 1969; Kuwana  
63 and Fujimoto, 1984; Muniesa and Dominguez, 1990) since first described by Swift (1914). It  
64 has been estimated that the number of PGCs at oviposition (stage X embryo) is 100-120. Such  
65 a reduced number of cells and the high potential of developmental plasticity make this  
66 developmental stage the best time for the elimination of endogenous PGCs.

67

68 On the other hand, the combined cytolytic action of antibodies and complement has been well  
69 known for over a century (Wiemann 1994) and has been applied with different therapeutic  
70 and experimental purposes. In rabbits previously grafted with cancer cells (Kalfayan & Kidd,  
71 1953) the combination of serum complement with antibodies against Brown-Pearce  
72 carcinoma cells achieved effective inhibition of tumor growth. Nowadays, one of the best  
73 treatments against cancer is the use of antibodies, with over 20 of different nature approved by  
74 various regulatory agencies (Macor & Tedesco 2007). As a consequence, in the last few  
75 decades the antibody-complement actions have been deeply investigated. It is known that  
76 complement modulates the complement dependent cytotoxicity (CDC) and antibody  
77 dependent cytotoxicity (ADCC). However, complement can have opposite effects; it can

immunosurgery PGCs

78 favor CDC and inhibit ADCC. Our understanding of the mechanisms involved when antibody  
79 and complement are acting together is still in its infancy (Rogers et al. 2014).

80

81 Like many malignant neoplastic cells, PGCs have a glycocalix rich in trisaccharide Gal $\beta$  (1-  
82 4), Fuc $\alpha$  (1-3)-GlcNAc $\beta$ 1-R4 which is recognized by antiSSEA1. In fact, antiSSEA1 has  
83 been widely used to enrich selectively PGCs from stage X embryos (Etches 1998) and  
84 gonocytes from embryos of 5days, stage 27 (Mozdziak 2006).

85

86 Therefore, the objective of this study was to create viable chick embryos without endogenous  
87 PGCs, taking advantage of the complement dependent cytolysis (CDC). We used antiSSEA1,  
88 Ig M monoclonal antibody, together with baby rabbit serum (BRS) as a source of complement  
89 to induce a selective ablation of the PGCs in stage X chicken embryos. These chicken  
90 embryos could be used as receptors for unique exogenous PGCs.

91

## 92 **RESULTS**

### 93 **“In vitro” cytolysis of avian blastoderm cells**

94 *Competition tests of dispersed blastodermal cells with haemolytic system (HS) composed by*  
95 *sheep red blood cell (SRBCs) and haemolysin in gelatine-Veronal buffer with Ca<sup>2+</sup> Mg<sup>2+</sup>.*

96 Haemolytic complement activity measures the complement classical pathway in serum. Fifty  
97 percentage of haemolytic complement activity (CH<sub>50</sub> or Kd=dissociation constant) in  
98 competition curves, measures serum haemolysis capacity in SRBCs. CH<sub>50</sub> is sensitive to any  
99 reduction of the classical pathway components. Therefore, haemolysis absorbance of SBRCs  
100 was evaluated (y-axis) with decreasing concentrations of baby rabbit serum (BRS) as a  
101 complement source (x-axis), without antiSSEA1 (yellow line) and with antiSSEA1 1/100

## immunosurgery PGCs

102 (blue line) in presence of blastodermal cells. Saturation curve with dispersed blastodermal  
 103 cells and antiSSEA1 1/100 revealed that, when blastodermal cells and antiSSEA1 were  
 104 present, the saturation was reached and that the Kd (CH<sub>50</sub>) was between 1/10 and 1/100  
 105 dilutions of BRS (Fig 1a). These dilutions were used for selective PGCs ablation studies. We  
 106 performed next experiments focused on dilutions of 1/00 and 1/40 for antiSSEA1 and BRS,  
 107 respectively.

108 *Evaluation of cellular lysis with trypan blue after challenges with antiSSEA1 and BRS.* In  
 109 isolated blastoderms the cellular lysis was evident in zona pellucida, where PGCs are  
 110 localized at this stage, while in control embryos none of the cells were stained (Fig 1b, A and  
 111 B).

### Figure 1. 1a Saturation curve.

Competition test with dispersed blastodermal cells and anti SSEA1 1/100. Haemolysis absorbance of sheep red blood cell (SRBC y-axis) with decreasing concentrations of baby rabbit serum (BRS) as a complement source (x-axis), without antiSSEA1 (yellow line) and with antiSSEA1 1/100 (blue line). When blastodermal cells and antiSSEA1 were present the saturation was reached and the CH<sub>50</sub> (Kd) was between 1/10 and 1/100 dilutions of BRS. Blastoderm cell suspensions from ten stage X embryos were used in each saturation curve. **1b. Deposition of antiSSEA1 and baby rabbit serum to the dorsal side of epiblast and evaluation of cellular lysis with trypan blue.** Chicken embryos stage X (A×4 and B×200), A) Control embryo treated with PBS and trypan blue exposed, none cell was stained by trypan blue (stereoscope Leica MZIII) B) Zona pellucida of one embryo challenged with antiSSEA1 and baby rabbit serum, there are blue cells stained (NIKON, Eclipse TE300, inverted microscope). C) Deposition of the treatment to the dorsal side of epiblast. D) 24 hours embryo, developmental stage referred in the manuscript as "early development".

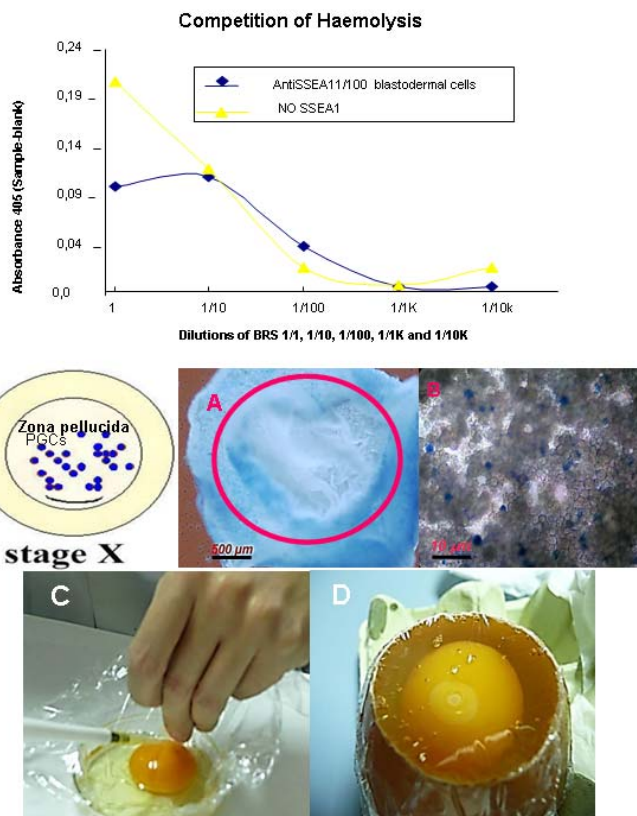

112

immunosurgery PGCs

113 **Ex-ovo treatments applied to stage X embryos and incubated in surrogated egg shells**  
114 **following Perry's system II**

115 *Embryonic development and number of PGCs in embryos treated with deposition of*  
116 *antiSSEA1 and baby rabbit serum to the dorsal side of epiblast. Two times of embryo*  
117 *development were evaluated, "early development" 24 hours after the application of the*  
118 *treatment (Fig 1b C and D) and "late development" 3-day. The evaluation of embryonic*  
119 *development revealed that the treatments and transfer manipulations did not affect neither*  
120 *embryo "early development" (67-100%) nor "late development" (56-90%) in any of the*  
121 *treated groups (AntiSSEA1 10/C+, 100/C+ and 1000/C+ groups) compared with control*  
122 *groups (AntiSSEA1-/C- and AntiSSEA1-/C+), Table 1. The mean survival days was 4.7, as*  
123 *expected in normal embryo development following Perry's system II (Fig 2a), with no*  
124 *significant differences between treatments. However, the number of PGCs detected was*  
125 *decreased in treated (4, 2.7 and 4 PGCs in AntiSSEA1 10/C+, 100/C+ and 1000/C+ groups,*  
126 *respectively) compared with control embryos (50 and 45 PGCs in AntiSSEA1-/C- and*  
127 *AntiSSEA1-/C+) (Fig 2b). A total of 2,400 tissue sections were immunostained and*  
128 *evaluated.*



## immunosurgery PGCs

**Table 1. Embryos distribution of “early” and “late development” when the treatment was deposited to the dorsal side of epiblast at stage X.** “Early development” 24 hours after the application of the treatment, the embryo continues to advance. “Late development” at day fourth embryos with heartbeat and vascular tree well formed.

| Treatment             | N° embryos | Early development   | Late development   | N° days    |
|-----------------------|------------|---------------------|--------------------|------------|
| AntiSSEA1-/C- CONTROL | 9          | 6                   | 5                  | 4.7        |
| AntiSSEA1-/C+ CONTROL | 8          | 8                   | 7                  | 5          |
| AntiSSEA1 10/C+       | 12         | 8                   | 7                  | 4.5        |
| AntiSSEA1 100/C+      | 11         | 11                  | 9                  | 4.8        |
| AntiSSEA1 1000/C+     | 10         | 9                   | 9                  | 4.9        |
| <b>TOTAL</b>          | <b>50</b>  | <b>42 (67-100%)</b> | <b>37 (56-90%)</b> | <b>4.7</b> |

129

130

131 *Ex-ovo dose-response study with deposition of antiSSEA1 and baby rabbit serum to the dorsal*  
132 *side of epiblast.* In all control embryos the PGCs counts were in the order of hundreds, while  
133 the percentage of embryos with scarce or without PGCs were increasing with 1/10 and 1/100  
134 concentration of antiSSEA1. The dose-response study evaluated “in toto” revealed that  
135 antiSSEA1 100/C+ 1/40 was the most effective treatment destroying PGCs, because none of  
136 PGCs were seen in any embryo receiving this treatment ( Table 2 and Fig 2c).

## immunosurgery PGCs

**Figure 2. Treated embryos. The treatment was deposited to the dorsal side of epiblast.** Days of survival (2a) and Number of PGCs (2b). PGCs were counted after a complete sectioning of embryos; a total of 2,400 tissue sections were evaluated. PGCs were immunochemically marked with antiSSEA1, biotinylated anti-mouse, followed by AP conjugated streptavidin and Fast Red. Three different experiments with at least 4 embryos per treatment group. 2c) Dose-response study in top-treated embryos, the PGCs were immunochemically marked with antiSSEA1 and antimouse alexa 488 "in toto". Y-axis percentage of embryos in each treatment group. X-axis: AntiSSEA1 (-, 1/10, 1/100 and 1/100)/Baby rabbit serum or C (- or + at 1/40) designed as -/-, -/+, 10/+, 100/+ and 1000/+. Each group has at least three embryos.

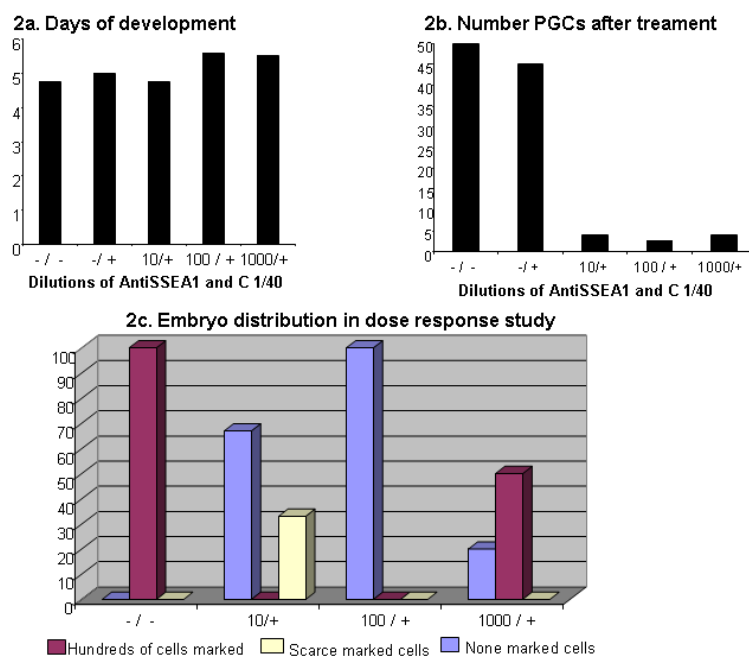

137

**Table 2. Results of dose-response study.** The treatment was sequentially deposited to the dorsal side of epiblast. The majority of the embryos overpassed day 4 of development or 22 HH stage (Hamburger&Hamilton's classification). None embryo showed marked PGCs in the treated group antiSSEA1 100/C+.

| Treatment AntiSSEA1/C | N° embryos | Developmental stage                                | Number of PGCs                                           | % Embryos w/o PGCs |
|-----------------------|------------|----------------------------------------------------|----------------------------------------------------------|--------------------|
| AntiSSEA1-/C-         | 3          | 26 HH<br>28 HH<br>22 HH                            | Hundreds<br>Hundreds<br>Hundreds                         | 0                  |
| AntiSSEA1+10/C        | 3          | 29 HH<br>20 HH<br>23 HH                            | None<br>None<br>44                                       | 33                 |
| AntiSSEA1+100/C       | 4          | 29 HH<br>29 HH<br>29 HH<br>10 HH                   | None<br>None<br>None<br>None                             | 100                |
| AntiSSEA1+1000/C      | 6          | 29 HH<br>27 HH<br>29 HH<br>26 HH<br>29 HH<br>19 HH | Hundreds<br>Hundreds<br>None<br>Hundreds<br>None<br>None | 50                 |
| AntiSSEA1-/C-         | 5          | 29 HH<br>27 HH<br>24 HH<br>29 HH                   | Hundreds<br>Hundreds<br>15<br>Hundreds<br>Hundreds       | 0                  |

138

immunosurgery PGCs

139 *Embryos treated with injections into the subgerminal space.* The evaluation of embryonic  
140 survival revealed that the injected treatments and transfer manipulations did not affect neither  
141 embryo “early development” (67-100%) nor “late development” (50-75%) in any of the  
142 treated groups (AntiSSEA1 100/C+100, 100/C+1000 and /C+10000 groups) compared with  
143 controls (AntiSSEA1-/C- and AntiSSEA1-/C+1000), Table 3. The mean survival for injected  
144 embryos (4.4 days) was not different from top-dressed ones (4.7 days; Table 3 and Fig 3a).  
145 The number of PGCs detected was decreased in treated (41, 28 and 45 PGCs in AntiSSEA1  
146 100/C+100, 100/C+1000 and 1000/C+10000 groups, respectively) compared with control  
147 embryos (82 and 100 PGCs in AntiSSEA1-/C- and AntiSSEA1-/C+1000, Fig 3b). The  
148 maximum cytolytic activity was achieved with anti SSEA1 100/C+1000. The complement  
149 alone did not show any cytolytic activity at 1/1000 dilution. Moreover, in a study of  
150 complement cytotoxicity all 6 embryos injected with AntiSSEA1-/C10 developed and had a  
151 high number of PGCs.

152 Unexpectedly, when antibody and complement were injected together in a single injection,  
153 only half of the embryos reached “early development” and none “late development” (Table 3  
154 and Fig 3a).

## immunosurgery PGCs

**Table 3. Embryo distribution of “early” and “late development” after subgerminal injections in chicken embryos at stage X.** "Early development" 24 hours after the application of the treatment, the embryo continues to advance. "Late development" at day fourth embryos with heartbeat and vascular tree well formed.

| Treatment<br>AntiSSEA1/complement | N° embryos | Early development   | Late development   | N° days    |
|-----------------------------------|------------|---------------------|--------------------|------------|
| AntiSSEA1-/C- CONTROL             | 12         | 9                   | 6                  | 4.7        |
| AntiSSEA1+100/C+1000              | 10         | 8                   | 8                  | 4          |
| AntiSSEA1+100/C+100               | 7          | 6                   | 4                  | 3.7        |
| AntiSSEA1+100/C+1000              | 4          | 4                   | 4                  | 5          |
| AntiSSEA1+100/C+10000             | 6          | 5                   | 5                  | 4.7        |
| Cocktail                          | 6          | 3                   | 0                  |            |
| <b>TOTAL</b>                      | <b>43</b>  | <b>35 (67-100%)</b> | <b>27 (50-75%)</b> | <b>4.4</b> |

155

**Figure 3. Subgerminally injected stage X embryos.** Days of embryo survival (3a) and Number of PGCs (3b). The PGCs were counted after sectioning of entire embryos, a total of 3,900 tissue sections were immunostained and evaluated. 3a) Days of embryo survival after sequential injections of antiSSEA1 (- or + 1/100) and C (-, 1/100, 1/1K and 1/10K). Joint injection of antiSSEA1 and baby rabbit serum (cocktail), none of embryos were developed. 3b) Number of PGCs, the maximum cytolytic activity was archived between antiSSEA1 +100-+/1K. The baby rabbit serum alone did not show any cytolytic action (-/1K).

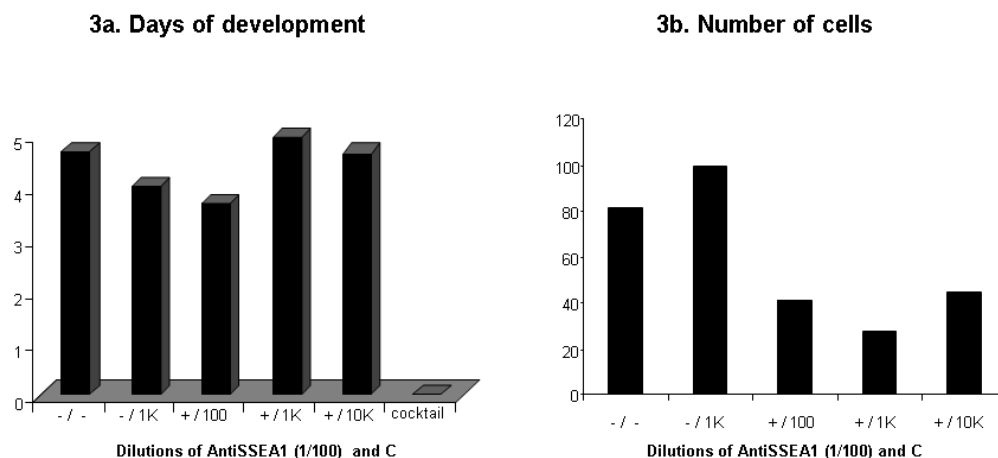

156

## immunosurgery PGCs

157

## 158 Immunocytochemistry and histological studies

159 *Immunohistochemistry in tissue sections.* In top-dressed and injected embryos, a total of 6,900

160 tissue sections were immunostained and the number of PGCs counted (Fig 4).

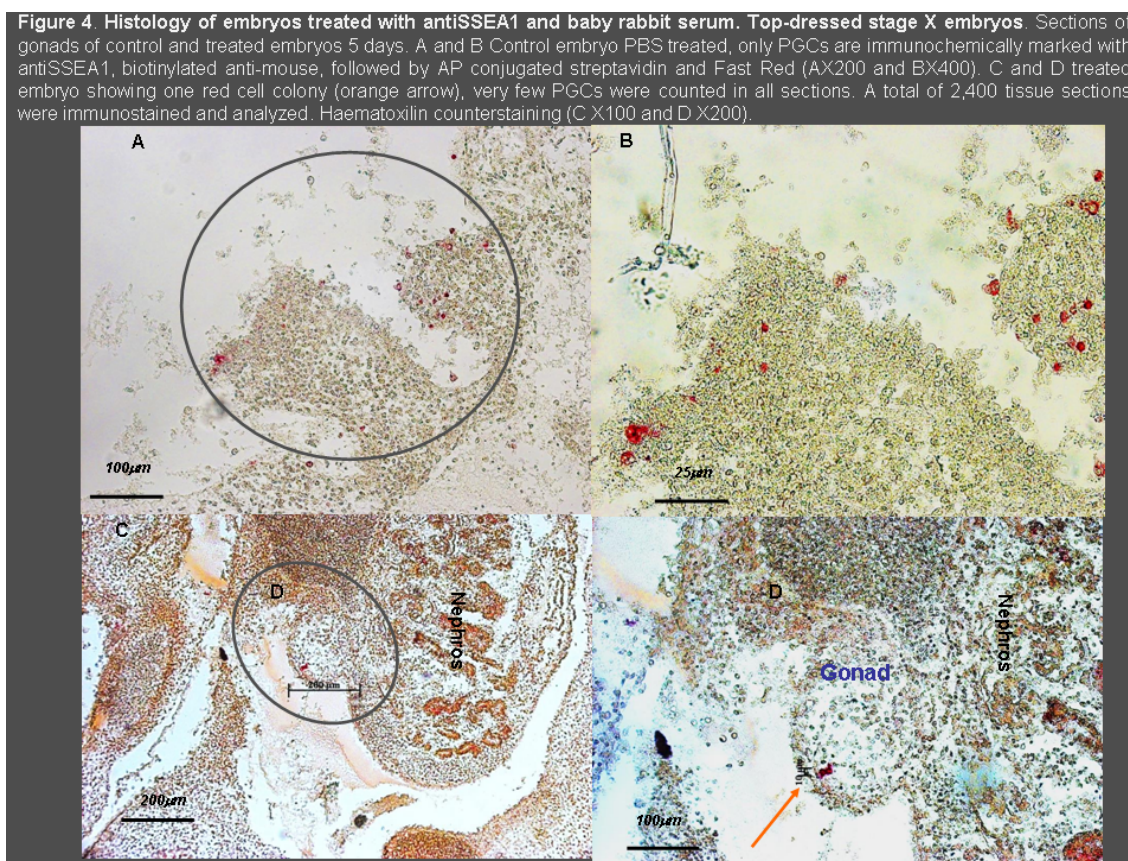

162 The data “number of PGCs” have been already presented above (Fig 2b and 3b).

163 *Immunohistochemistry “in toto”.* In order to stain PGCs the embryos needed a strong  
164 permeabilization step (1% DMSO+0.1% triton X-100 in PBS overnight) and long periods of  
165 antibodies incubations (antiSSEA1 and Ig G donkey antimouse alexa 488, with 48 and 24  
166 hours at room temperature, respectively). In control embryos the presence of hundreds of

## immunosurgery PGCs

167 PGCs can be visualized in Fig 5 A. In Fig 5B and 5C most of the PGCs are already in the  
168 gonads but some are in their way migrating from the aorta, only PGCs were marked.

169 In some embryos of the antiSSEA1-/C+ group the immunocytohistology showed hundreds of  
170 labelled cells in their gonads but the labeling was not as strong as in the antiSSEA1-/C- group  
171 (Fig 5D E). The confirmation of the PGCs presence was made with a histological Alcian  
172 Blue-PAS staining (Fig 5F). In contrast, none of the four treated embryos showed any PGCs  
173 (Fig 6 A', B', C' and D').

174

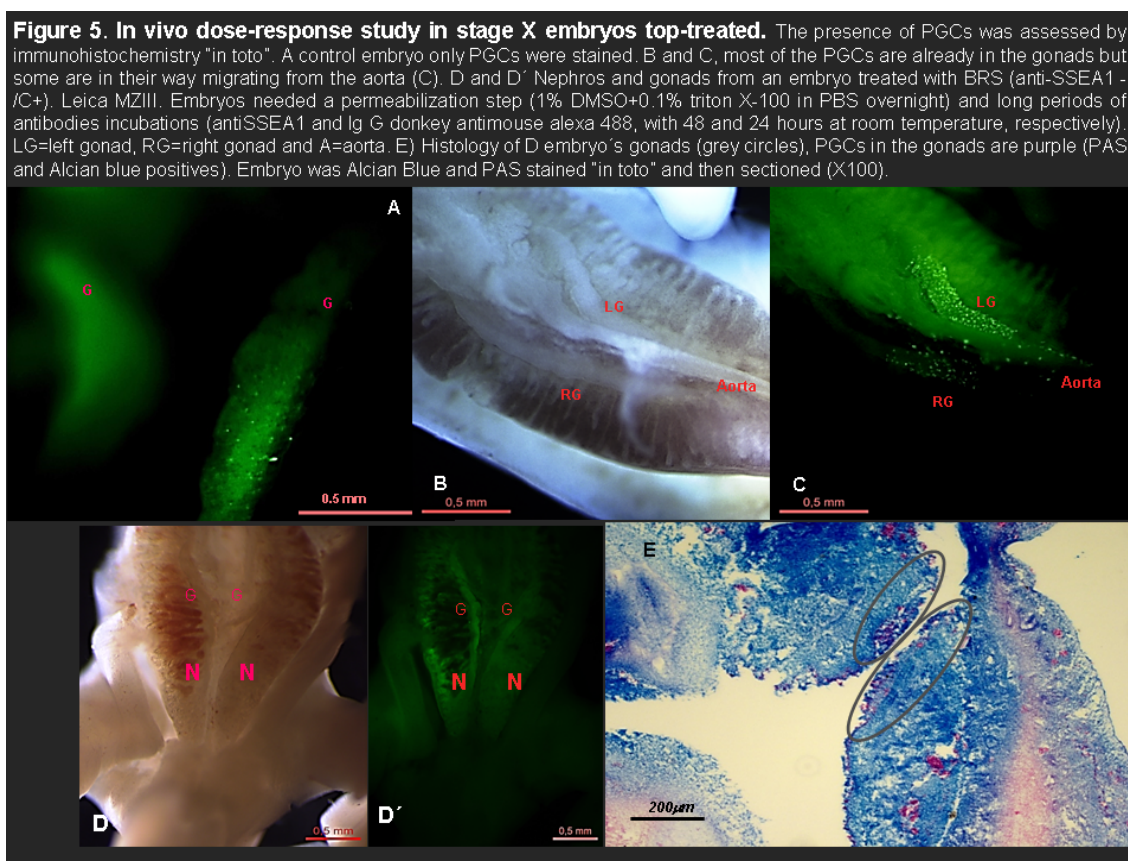

175



## immunosurgery PGCs

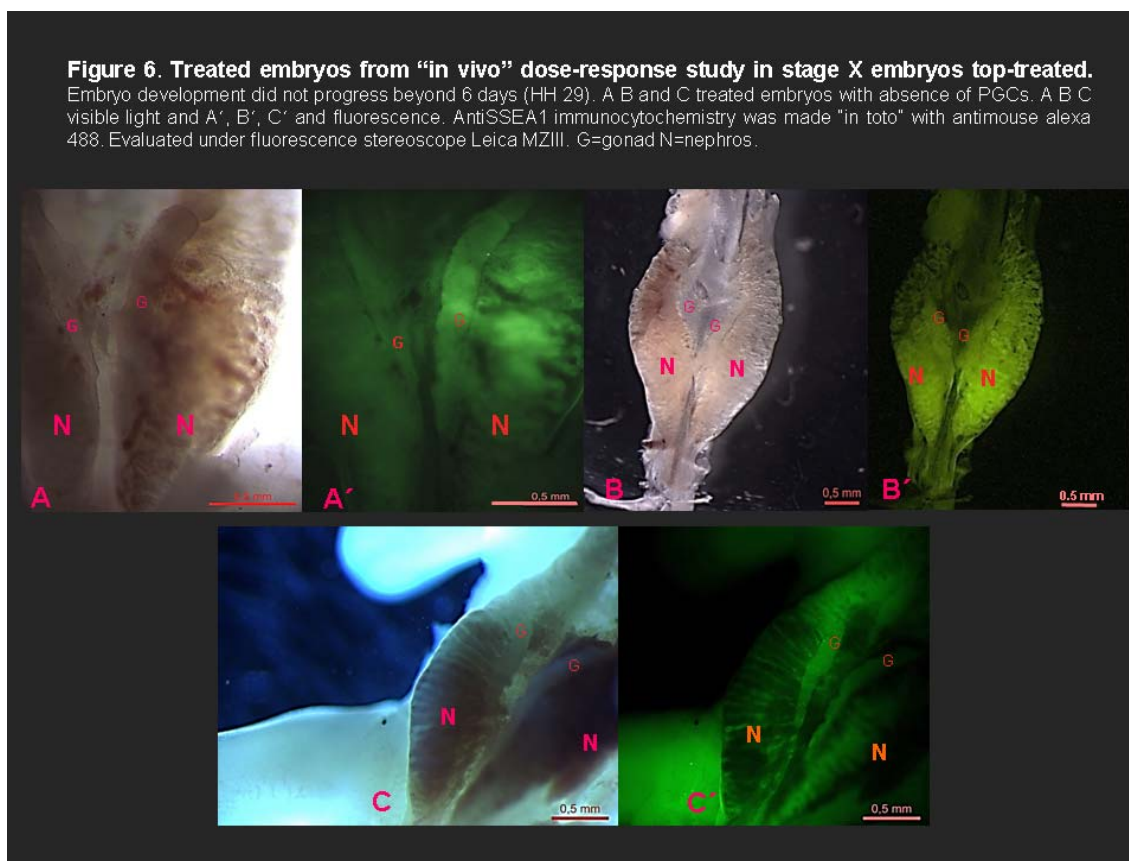

176

177

## 178 DISCUSSION

179 Our results demonstrated that immune-mediated ablation is an effective method for  
180 decimating the internal population of PGCs when preparing recipient chick embryos for germ  
181 line chimera construction. Germ cell numbers can be substantially reduced while embryo  
182 development is not affected. Treatment, dose and route had an impact on effectiveness and on  
183 survivability.

184 “In vivo” top-dress application, directly on the germinal disc, is, by far, the best assayed. No  
185 instrumentation is needed (stereomicroscope or micro injector) and it is the most gentle on the  
186 embryo. The response, in terms of PGCs numbers in the gonads, was dose dependent. Almost  
187 a complete ablation was achieved using antiSSEA1 and complement at 1/100 and 1/40

## immunosurgery PGCs

188 dilutions, respectively. These doses are coincident with our results obtained in the “in vitro”  
189 competition studies with SBRCs. We must emphasize that the duration of embryonic  
190 development and the organic structures were normal. There was a concern that this form of  
191 administration could be insufficient, as the molecules of antiSSEA1 and complement must  
192 cross not only the vitelline membranes but also the blastoderm itself. Gerhart et al. were able  
193 to ablate two lineages of epiblast cells expressing skeletal muscle (MyoD) and neuronal  
194 (NeuroM) surface antigens (Gerhart et al. 2008; Gerhart et al. 2010). Supporting in part, our  
195 studies in using this route, since PGCs are concentrated on the hypoblast at stage X.

196 This was the reason why direct treatment injection on the subgerminal space, that is,  
197 immediately below the hypoblast, was also assayed. We expected this route would be more  
198 effective on PGCs but also more damaging on the embryo because of repeated puncture of the  
199 vitelline membrane. As anticipated, relative to top-dressing, sequential subgerminal  
200 application required less complement (antiSSEA1/100 plus C 1/1000), to yield an equally  
201 extensive PGCs ablation; survival of the embryos was, however, not impaired. There could be  
202 two reasons why less complement is needed when injected; first, the effective complement  
203 concentration around the target PGCs should be undoubtedly higher, as losses due to diffusion  
204 are minor; second, the antiSSEA1 labelling on the target cells is more extensive, since the  
205 injected antibody is not washed away after a short reaction time as when top-dressed.

206 In both strategies, the natural Ig and innate complement system present in BRS could be  
207 implicated (Gerencer et al. 1998). The most probable mechanism would be that once  
208 antiSSEA1 is bound to the outer Gal $\beta$  (1-4), Fuc $\alpha$  (1-3)-GlcNAc $\beta$ 1-R4 of PGCs, the rabbit  
209 innate complement system will consequently induce PGCs cytolysis by Complement Classical  
210 Pathway activation (C<sub>1q</sub>). Gerhart’s results and the fact that in stage X embryos, neither  
211 complement enzymes nor IgM are present, support this mechanism. AntiSSEA1 has been



## immunosurgery PGCs

212 frequently used to enrich PGCs isolates (Etches 1998 and Mozdziak 2006) although other  
213 antibodies have also been successful, as EMA-1, NC-1 and VASA. The later could be an  
214 optimum choice because of its specificity for germ line cells, as long as a good chicken  
215 antiVASA would be available.

216 We assayed a third administration strategy, joint injection of antiSSEA1 plus BRS into the  
217 subgerminal space, in case the double injection proved too detrimental to embryo viability.  
218 An unforeseen and remarkable disruption was observed on germinal disc development  
219 following injection of the antiSSEA1-BRS mixture. It suggests that a massive, untargeted  
220 cytolytic activity was developed that damaged several embryonic cell populations and  
221 structures. The only report on simultaneous use of antibody and serum (premixed before  
222 administration) “in vivo” is that of Takami et al. (2006) when treating a CNS lymphoma with  
223 rituximab, after previous treatment failures applying the antibody alone intraventricularly  
224 (Schulz et al. 2004). Generally, when the antibody-complement complex is used to direct a  
225 cytolysis over certain cell populations, the “modus operandi” is: the cells are first exposed to  
226 the antibody and, later on, the complement is applied to induce the lysis of only those cells  
227 previously targeted (Gerhart et al.2008, Gerhart et al. 2010, Chen and Melton 2007). Maybe  
228 other enzymes besides Cq1 of the complement system could be activated through the Lectin  
229 pathway. Several types of lectins present in serum have been studied, among them, mannose-  
230 binding lectins (bind to mannose) and ficolins (bind to GlcNAc or fucose). The latter need  
231 IgM to activate Lectin pathway (Endo et al. 2015). Humoral ficolins present in BRS could  
232 very well bind to IgM (antiSSEA1) when mixed and subsequently activate the complement  
233 enzymes (C<sub>4</sub> and C<sub>2</sub>), which in turn, will destroy indiscriminately blastodermal cells.  
234 Supporting our hypotesis, Lei et al. (2015) have described a novel IgM–H-Ficolin  
235 complement pathway which ablates “in vitro” allogenic human cancer cells. Glycans covering  
236 blastodermal cells, as well as cancer cells, have GlcNAc and fucose (Endo et al. 2015 and Lei

## immunosurgery PGCs

237 et al. 2015). In stage X chick embryos the glycocalyx of blastodermal cells and PGCs are  
238 richer in GlcNAc than in mannose (author unpublished observations). Taken together all we  
239 suggest a possible implication of IgM-ficolins complexes in this massive destruction.  
240 However, obviously the question of why antibody-complement together strongly increased  
241 cytolytic effects needs to be further investigated.

242 The use of monoclonal antibodies and complement is one of the most promising therapies in  
243 cancer. However, in long term treatments with specific antibodies, some tumours produce  
244 their own complement and others modulate the complement regulators resulting in the  
245 inhibition of the innate complement. As far as we know, premixing of exogenous complement  
246 and monoclonal antibody has not been reported as a strategy to boost antibody therapeutical  
247 effects. Our results are supported by the reported treatment of primary central nervous system  
248 lymphoma in humans using Rituximab (monoclonal antibody against primary lymphoma  
249 cells) and exogenous complement (Nishimura et al. 2003). Therefore, the mixture of  
250 antibody-complement previously to its local application could be very useful to treat large  
251 established tumours from which available antibodies exist and also to potentiate the antibody  
252 efficiency.

253 On the other hand, the lack of cytolytic response in our control, demonstrates that complement  
254 alone, even when directly injected into the subgerminal space at the highest concentration  
255 (C+1/10 dilution), is not cytotoxic for the developing stage X embryo: it failed to reduce the  
256 endogenous PGCs population and it did not affect embryo viability at all.

257 Therefore, two protocols successfully produced lysis of the primordial germ cells by specific  
258 cell labelling with antibody followed by heterologous serum with innate complement system  
259 present in BRS. Dress-on application is simpler and faster than subgerminal injection while  
260 equally effective, although larger quantities of reagents are needed. Both methods are capable

immunosurgery PGCs

261 of producing an almost complete ablation of the germline cells in chicken embryos with a  
262 high efficiency without damaging other embryonic structures at stage X embryos.

263

## 264 **MATERIALS and METHODS**

### 265 **Egg source**

266 Freshly fertilized laid chicken eggs were obtained from Cobb SA (Alcalá de Henares, Madrid,  
267 Spain). Housing and management of the laying hens (*Gallus gallus*, Linn) comply with  
268 welfare and sanitary EU standards.

### 269 **“In vitro” cytolysis of avian blastoderm cells**

270 *Competition tests of dispersed blastodermal cells with haemolytic system (HS)*. The optimal  
271 dilution of the available complement systems was established in a complement assay with  
272 baby rabbit serum (BRS) and haemolytic system (HS; SRBC and haemolysin in gelatine-  
273 Veronal buffer containing  $\text{Ca}^{2+}$  and  $\text{Mg}^{2+}$ , SRBCs). All reactives were generously supplied by  
274 Margarita López Trascasa, Hospital La Paz, Madrid Spain. Indirect estimation of blastoderm  
275 cytolysis was made using SRBCs, HS and blastoderm cells in competition assays. Maximum  
276 haemolysis was induced by addition of distilled water to HS. The  $\text{CH}_{50}$  was established as the  
277 range of those dilutions of BRS when haemolytic action was exhausted, and SRBCs started to  
278 settle down in round-bottom ELISA plates.

279 A total of 32 blastoderms were isolated from embryonated eggs at oviposition and  
280 disaggregated with repeated pipetting for three competitive studies. First, the blastoderm cell  
281 suspensions of ten stage X embryos (300  $\mu\text{l}$  approx  $10^7$  cells/ml) were incubated in assay  
282 tubes with monoclonal antibody antiSSEA1 obtained as concentrate from the Developmental  
283 Studies Hybridoma Bank (1/100 and 1/1000) during 45 minutes at  $37^\circ\text{C}$  in a water bath. Next,

## immunosurgery PGCs

284 BRS (1/10; 1/100; 1/1000 and 1/10000) plus HS were added and, after incubation for an  
285 additional hour at 37°C in a water bath, the reaction cocktail was centrifuged 1000 g for 10  
286 minutes and the supernatant was transferred to a multi-well plate where absorbance at 405 nm  
287 was recorded. At the end of the second incubation, each reaction tube was evaluated for  
288 SRBC sedimentation: a reddish sediment in the tube reveals incomplete haemolysis since the  
289 complement in the reaction mix has been exhausted. Conversely, absence of SRBC sediment  
290 denotes excess complement activity in the mix. The degree of haemolysis was measured as  
291 the absorbance of the supernatants at 405nm. Saturation curves revealed that CH<sub>50</sub> was  
292 reached after adding BRS between a range of 1/10 -1/100 dilutions.

293 Next, a total of 26 entire blastoderms were isolated for the evaluation of cell viability  
294 described previously (Gerhart et al. 2008). In brief, each isolated embryo was placed in a well  
295 with cell culture medium M199 in four experiments following previously described culture  
296 conditions (Lopez-Diaz et al. 2016). Next, the blastoderms were challenged to antiSSEA1  
297 (1/100 and 1/1000) incubated during 45 minutes at 37°C and then to BRS (1/50). After  
298 incubation for an additional hour at 37°C, the evaluation of cell destruction was made adding  
299 4% trypan blue (4µl). Control blastoderms were incubated with only M199 or BRS+M199.

## 300 **Ex-ovo treatments applied to stage X embryos and incubated in surrogated egg shells** 301 **following Perry's system II**

302 *Deposition of antiSSEA1 and baby rabbit serum to the dorsal side of epiblast.* Embryonated  
303 chicken eggs at ovoposition (stage X) were cleaned with alcohol or with a solution of sodium  
304 hypochlorite for 30 or 60 minutes before use. The eggs content was poured on sterile Petri  
305 dishes to expose and manipulate the embryos following Gerhart's procedure (Gerhart et al.  
306 2008) with some variations. Briefly, the albumen covering the germinal disc was cleaned with  
307 sterile cellulose tissues until a well-marked hollowness appeared. Once the germinal discs

## immunosurgery PGCs

308 were free from albumen, 100  $\mu$ l of antiSSEA1 (1/10, 1/100 and 1/1000) were pipetted on top  
309 of the germinal disc and covered with a piece of parafilm. The treated embryos were  
310 incubated in an oven at 37°C saturated with moisture for 1 hour. The excess of unbound  
311 monoclonal antibody was washed away three times with PBS and BRS was immediately top-  
312 dressed on the blastoderm. Baby rabbit serum (diluted 1/40 in PBS + 0.1% skim milk) was  
313 used as a source of complement because it only has the innate complement system (C) and  
314 natural immunoglobulins, lacking immune IgG and IgM (Gerencer et al. 1998). The  
315 blastoderm was covered with parafilm and incubated for another hour in the same conditions.  
316 After washing the BRS, the contents of eggs were transferred to surrogate egg shells  
317 following Perry's system II (Perry, 1988). A total of 50 embryos were evaluated and  
318 histologically studied from three different experiments with at least 4 embryos per treatment  
319 group (antiSSEA1 -/C-; antiSSEA1 10/C+, antiSSEA1 100/C+, antiSSEA1 1000/C+ and  
320 antiSSEA1 -/C+).

321 *Treatment with two sequential injections into the subgerminal space.* Embryos were injected  
322 into the subgerminal space where PGCs are localized at stage X. First, a volume between 5-10  
323  $\mu$ l of antiSSEA1 (1/100) was injected with micropipettes using a pneumatic fluid  
324 microinjector (Injectmatic, Geneva, CH). The treated embryos were incubated in an oven at  
325 37 °C saturated with moisture for 1 hour. Later, BSR was injected at different dilutions  
326 (1/100, 1/1000 and 1/10000). After the last injection the contents of eggs were transferred to  
327 surrogate egg shells. A total of 43 embryos were evaluated from three different experiments  
328 with at least 4 embryos per treatment group (antiSSEA1 -/C-, antiSSEA1 100/C100,  
329 antiSSEA1 100/C+1000, antiSSEA1 100/C+10000 and antiSSEA1 -/C+1000). In order to rule  
330 out a possible direct cytotoxic effect of BRS, a study was undertaken injecting subgerminally  
331 a maximum dose of complement 1/10 (antiSSEA1 -/C+10), including as well, a control group  
332 (antiSSEA1-/C-).

## immunosurgery PGCs

333 *Treatment with a single injection into the subgerminal space.* Six embryos were injected into  
334 the subgerminal space as indicated above, except that antiSSEA1 and BRS were jointly  
335 applied in a single injection (antiSSEA1 10/C+10).

336 *Evaluation of embryo development.* Everyday “embryo development” was checked and  
337 recorded. Embryo development was recorded as “early development” on progress, if next day  
338 after the application of the treatment, germinal disc showed normal growth and no yolk  
339 leaking was seen. On third day “late development” was recorded as normal when the vessels  
340 were formed and the heart was beating. Embryos were incubated at least until 5-6 day in an  
341 egg incubator (Octagon) on system II (Perry 1988). Once the incubation was over or the  
342 embryo development stopped, the embryos were dissected, fixed and conserved in methanol  
343 70% until histological and immunohistological studies were undertaken.

## 344 **Immunocytochemistry and histological studies**

345 *Top-dressed and sequential injections into the subgerminal space embryos.* The presence of  
346 PGCs was assessed by an alkaline phosphatase (AP) immunocytochemical detection system  
347 using antiSSEA1 (DSHB; Iowa City, IA, U.S.A.). Briefly, embryos were fixed in Bouin’s  
348 solution overnight, embedded in parafine and entirely cut with microtome into tissue sections  
349 of 10 µm. A total of 6,300 tissue sections were analyzed (a mean of 100 tissue sections per  
350 embryo). To minimize nonspecific binding, the tissue slices were treated for 3 hours with 3%  
351 BSA and 0.1% triton X-100 in PBS before immunostaining. The optimal concentration of  
352 each antibody was selected based on the results of preliminary experiments (1/300 for  
353 antiSSEA1 and anti-mouse). Tissues were incubated for 24-48 hours with the primary  
354 antibody at 4°C and subsequently reacted for 24 hours each with biotinylated anti-mouse  
355 (Sigma B0529, for monoclonal first antibody) followed by AP conjugated streptavidin (Sigma  
356 E2636). Fast Red was used as substrate chromogen. To avoid interference by the potential

## immunosurgery PGCs

357 endogenous activity of AP, the tissues were treated with 0.02 M levamisole or heat inactivated  
358 at 70 °C for 30 minutes.

359 *Dose-response study.* In the dose-response study the number of PGCs was evaluated “in toto”  
360 embryos by immunohistochemistry. Briefly, embryos were fixed in 4% paraformaldehyde in  
361 PBS overnight at 4 °C, permeabilized using 1% DMSO and 0.1% triton X-100 in PBS  
362 overnight and unspecific binding blocked at 4 °C overnight with 3% BSA and 0.1% triton X-  
363 100 in PBS before immunostaining. The presence of PGCs was assessed by Ig G donkey  
364 antimouse alexa 488 (24 hours at room temperature, Invitrogen) and antiSSEA1 as primary  
365 antibody (48 hours of incubation). This immunohistochemistry allowed us a clear  
366 identification of PGCs with absent fluorescent background. The nephros and gonads were  
367 dissected and the number of PGCs twice counted under a stereoscope LEICA MZIII and an  
368 inverted fluorescence microscope by two people (Nikon, Eclipse TE300; Tokyo, Japan, fitted  
369 with a H910104A, TE-FM Epi-Fluorescence Lamp). The results were classified as: no cells =  
370 none PGCs marked, countable cells = less than 100 marked PGCs and uncountable cells =  
371 hundreds of PGCs were marked. In order to confirm that PGCs were marked, other  
372 histological studies were made like PAS. In some embryos with weak fluorescece labelled  
373 PGCs, specially all those treated only with complement, the gonads were stained with Alcian  
374 Blue and PAS (Merk Germany 1.016460001) following the manufacturer’s instructions.  
375 PGCs are Alcian Blue and PAS positive which gives a unique purple color at HH 27  
376 developmental stage (5 days).

## 377 **Acknowledgements**

378 The authors acknowledge the valuable support of Dra Capitolina Díaz Martínez, President of  
379 AMIT (Asociación de Mujeres Investigadoras y Tecnólogas). The valuable help of Soraya  
380 Martínez-Alcocer and Diana González-Chamorro for histological processing is gratefully

immunosurgery PGCs

381 acknowledged. This study was partly supported by the grant AGL 2009E06345–MICINN  
382 (Spain).

383           The monoclonal antibody antiSSEA1 developed by Solter and Knowles was obtained  
384 from the Developmental Studies Hybridoma Bank developed under the auspices of the  
385 NICHD and maintained by The University of Iowa, Department of Biology, Iowa City, IA  
386 52242.

387



immunosurgery PGCs

388           **REFERENCES**

- 389           **1. Aige-Gil, V. and Simkiss, K.** 1991. Sterilisation of avian embryos with busulphan.  
390           *Research in Veterinary Science.* 50: 139–144.
- 391           **2. Bresler, M., Behnam, J., Luke, G., and Simkiss, K.** 1994. Manipulations of germ-  
392           cell populations in the gonad of the fowl. *Br. Poult. Sci.* 35, 241–247.
- 393           **3. Carsience, R., Clark, M., Verrinder Gibbins, A., Etches, R.** 1993. Germline  
394           chimeric chickens from dispersed donor blastodermal cells and compromised recipient  
395           embryos. *Development.* **117**, 669–675.
- 396           **4. Chen, A. E. and Melton, D.A.** 2007. Derivation of human embryonic stem cells by  
397           immunosurgery. *J Vis Exp.* (10):574. doi: 10.3791/574. Epub 2007 Dec 13.
- 398           **5. Dubois, R.** 1969. Données nouvelles sur la localisation des cellules germinales  
399           primordiales dans le germe non incubé de poulet. *C. R. Acad. Sci.* **269**, 205–208.
- 400           **6. Endo Y., Matsushita, M., Fujita, T.** 2015. New insights into the role of ficolins in  
401           the lectin pathway of innate immunity. *Int Rev Cell Mol Biol.* **316**:49-110. doi:  
402           10.1016/bs.ircmb.2015.01.003. Epub 2015 Feb 20.
- 403           **7. Etches R.** Methods for selecting germ-line competent cells in chicken embryos, and  
404           the use of the cells in the production of chimeras. 1998. International Patent  
405           Classification. C12N 5/06, A01K 67/027.
- 406           **8. Gerencer, M., Barrett, PN., Kistner, O., Mitterer, A., Dorner, F.** 1998. Natural  
407           IgM antibodies in baby rabbit serum bind high-mannose glycans on HIV type 1  
408           glycoprotein 120/160 and activate classic complement pathway. *AIDS Res Hum*  
409           *Retroviruses.* **14**(7):599-605.
- 410           **9. Gerhart, J., Neely, C., Pfautz, J., George-Weinstein, M.** 2008. Tracking and  
411           ablating subpopulations of epiblast cells in the chick embryo. *Biol Proced Online.* Sep  
412           1;**10**:74-82. doi: 10.1251/bpo145.

immunosurgery PGCs

- 413       **10. Gerhart, J., Pfautz, J., Neely, C., Elder, J., DuPrey, K., , Menko, A.Sue., Knudsen**  
414           **K. and George-Weinstein, M.** 2010. Noggin producing, MyoD-positive cells are  
415           crucial for eye development. *Dev Biol.* 2009 December 1; 336(1): 30–41.
- 416       **11. Hemsworth, B. N., Jackson, H.** 1963. Effect of busulphan on the developing ovary in  
417           the rat. *J Reprod Fert.* **6**: 229-233.
- 418       **12. Kalfayan , B., and Kidd, J. G.** 1953. Structural changes produced in Brown-Pearce  
419           carcinoma cells by means of a specific antibody and complement. *J Exp Med.*1953  
420           Jan;97(1):145-62.
- 421       **13. Kino, K. B., Pain, B., Leibo, M., Cochran, M., Clark, M. E., Etches, R. J.** (1997).  
422           Production of chicken chimeras from injection of frozen-thawed blastodermal cells.  
423           *Poult. Sci.* **76**:753–760.
- 424       **14. Kuwana, T. and Fujimoto, T.** 1984. Locomotion and scanning electron microscopic  
425           observations of primordial germ cells from the embryonic chick blood *in vitro.* *Anat.*  
426           *Rec.* **209**, 337-34.
- 427       **15. Lei, X., Liu, C., Azadzo, K., Li, C., Lu, F., Xiang, A., Sun, J., Guo, Y., Zhao, Q.,**  
428           **Yan Z., Yang, J.** 2015. A novel IgM–H-Ficolin complement pathway to attack  
429           allogenic cancer cells in vitro. *Scientific reports* | 5: 7824 | DOI: 10.1038/srep07824.
- 430       **16. Lia, C-H., Kagamib, H., Matsuib, K., Onob, T.** 2001. Restriction of proliferation of  
431           primordial germ cells by the irradiation of Japanese quail embryos with soft X-rays.  
432           *Comparative Biochemistry and Physiology. Part A* **130** 133\_140.
- 433       **17. Lopez-Diaz, Mariacruz, Bujan-Varela, J., Cadorniga-Valiño, C.** 2016. Viable  
434           pluripotent chick blastodermal cells can be maintained long term in an alkaline defined  
435           medium. *In Vitro Cellular & Developmental Biology - Animal* (9989). DOI:  
436           10.1007/s11626-015-9989-5.

immunosurgery PGCs

- 437       **18. Macor, P., and Tedesco, F.** 2007. Complement as effector system in cancer  
438           immunotherapy. *Immunol Lett.* Jul 31; **111**(1):6-13. Epub 2007 May 29.
- 439       **19. Maeda, T., Clark, M. E., Etches, R. J.** 1998. Mortality, size of the gonads, and  
440           ultrastructure of primordial germ cell in chick embryos treated with  $\gamma$ -irradiation or  
441           injected with donor cells. *Poult. Sci.* **77**:905–907.
- 442       **20. Mozdziak, P. E., Wysocki, R., Angerman-Stewart, J., Pardue, S. L., and Petite,**  
443           **J. N.** 2006. Production of Chick Germline Chimeras from Fluorescence-Activated  
444           Cell-Sorted Gonocytes. *Poultry Science.* **85**:1764–1768.
- 445       **21. Muniesa, P. and Dominguez, L.** 1990. A morphological study of primordial germ  
446           cells at pregastrular stages in the chick embryo. *Cell Differ Dev.* Aug; **31**(2):105-17.
- 447       **22. Naito M., Harumi T., Kuwana T.** 2015. Long-term culture of chicken primordial  
448           germ cells isolated from embryonic blood and production of germline chimaeric  
449           chickens. *Anim Reprod Sci.* Feb; **153**:50-61. doi: 10.1016/j.anireprosci.2014.12.003.  
450           Epub 2014 Dec 24.
- 451       **23. Nakamura, Y., Usui, F., Miyahara, D., Mori, T., Ono, T., Kagami, H., Takeda,**  
452           **K., Nirasawa, K., Tagami, T.** 2012. X-irradiation removes endogenous primordial  
453           germ cells (PGCs) and increases germline transmission of donor PGCs in chimeric  
454           chickens. *J Reprod Dev.* **58**(4):432-7. Epub 2012 Apr 13.
- 455       **24. Nishimura, R., Goto, Y., Maeba, H. et al.** 2003. Simultaneous supply of human  
456           complement required for an effective treatment of CNS lymphomas with rituximab:  
457           therapeutic experimental evidence. *Blood.* **102**: 4958a.
- 458       **25. Perry M. M.** 1988. A complete culture system for the chick embryo. *Nature.* 331, 70 -  
459           72 (07 January 1988).

immunosurgery PGCs

- 460       **26. Petite, J. N., Clark, M. E., Liu, G., Gibbins, A. M. V., Etches, R. J.** 1990.  
461           Production of somatic and germline chimeras in the chicken by transfer of early  
462           blastodermal cells. *Development*. **108**,185–189.
- 463       **27. Reynaud, G.** 1977. Action du Busulphan sure la lignee germinale de l’embryon de  
464           poulet. *Bull. Soc. Zool. France* **102**, 41.
- 465       **28. Rogers, L. M., Veeramani, S., Weiner, G. J.** 2014. Complement in monoclonal  
466           antibody therapy of cancer. *Immunol Res.* Aug;59(1-3):203-10. doi: 10.1007/s12026-  
467           014-8542-z.
- 468       **29. Schulz, H., Pels, H., Schmidt-Wolf, I., Zeelen, U., Germing, U., Engert, A.** 2004.  
469           Intraventricular treatment of relapsed central nervous system lymphoma with the anti-  
470           CD20 antibody rituximab. *Haematologica*. **89**: 753–4.
- 471       **30. Song, Y., D’costa S., Pardue S. L., and Petite J. N.** 2005. Production of Germline  
472           Chimeric Chickens Following the Administration of a Busulfan Emulsion. *Molecular*  
473           *Reproduction and Development*. **70**:438–444.
- 474       **31. Solter D. and Knowles B. B.** 1975. Immunosurgery of mouse blastocyst. *Proc Natl*  
475           *Acad Sci U S A.* 1975 Dec; 72(12): 5099–5102.
- 476       **32. Speksnijder, G., and Ivarie, R.** 2000. A Modified Method of Shell Windowing for  
477           Producing Somatic or Germline Chimeras in Fertilized Chicken Eggs. *Poultry Science*.  
478           **79**:1430–1433.
- 479       **33. Stern, C.D.** 1991. The sub-embryonic fluid of the egg of the domestic fowl and its  
480           relationship to the early development of the embryo. In: *Avian incubation*. (ed. S.G.  
481           Tullett) London: Butterworths. pp. 81-90.
- 482       **34. Swift, H. M.** 1914. Origin and early history of the primordial germ-cells in the chick.  
483           *Am J Anat.* U S A. **15**:486.

immunosurgery PGCs

- 484       **35. Takami, A., Hayashi, T., Kita, D., Nishimura, R., Asakura, H., Nakao, S.** 2006.  
485           Treatment of primary central nervous system lymphoma with induction of  
486           complement dependent cytotoxicity by intraventricular administration of autologous-  
487           serum-supplemented rituximab. *Cancer Sci.* January 2006 vol. 97 no. 1 | 81.
- 488       **36. van de Lavoie, M.C., Diamond, J.H., Leighton, P.A., Mather-Love, C., Heyer,**  
489           **B.S., Bradshaw, R., Kerchner, A., Hooi, L.T., Gessaro, T.M., Swanberg, S.E.,**  
490           **Delany, M.E., Etches, R.J.** 2006. Germline transmission of genetically modified  
491           primordial germ cells. *Nature.* Jun 8; **441**(7094):766-9.
- 492       **37. Whyte, J.; Glover, J.; Woodcock, M.; Brzezczynska, J.; Taylor, L.; Sherman,**  
493           **A.; Kaiser, P.; McGrew, M.** 2015. FGF, Insulin, and SMAD Signaling Cooperate for  
494           Avian Primordial Germ Cell Self-Renewal. In: *Stem Cell Reports*, 01.11.
- 495       **38. Wiemann, B., Starnes, C.O.** 1994. Coley's toxins, tumor necrosis factor and cancer  
496           research: a historical perspective. *Pharmacol Ther.* **64**:529-564.  
497

immunosurgery PGCs

498 **FIGURE LEGENDS**

499 **Figure 1. 1a Saturation curve. Competition test with dispersed blastodermal cells and**  
500 **anti SSEA1 1/100.** Haemolysis absorbance of sheep red blood cell (SBRC y-axis) with  
501 decreasing concentrations of baby rabbit serum (BRS) as a complement source (x-axis),  
502 without antiSSEA1 (yellow line) and with antiSSEA1 1/100 (blue line). When blastodermal  
503 cells and antiSSEA1 were present the saturation was reached and the CH50 (Kd) was between  
504 1/10 and 1/100 dilutions of BRS. Blastoderm cell suspensions from ten stage X embryos were  
505 used in each saturation curve. **1b. Deposition of antiSSEA1 and baby rabbit serum to the**  
506 **dorsal side of epiblast and evaluation of cellular lysis with trypan blue.** Chicken embryos  
507 stage X (Ax4 and B x200), A) Control embryo treated with PBS and trypan blue exposed,  
508 none cell was stained by trypan blue (stereoscope Leica MZIII) B) Zona pellucida of one  
509 embryo challenged with antiSSEA1 and baby rabbit serum, there are blue cells stained  
510 (NIKON, Eclipse TE300, inverted microscope). C) Deposition of the treatment to the dorsal  
511 side of epiblast. D) 24 hours embryo, developmental stage referred in the manuscript as "early  
512 development".

513

514 **Figure 2. Treated embryos. The treatment was deposited to the dorsal side of epiblast.**  
515 Days of survival (2a) and Number of PGCs (2b). PGCs were counted after a complete  
516 sectioning of embryos, a total of 2,400 tissue sections were evaluated. PGCs were  
517 immunochemically marked with antiSSEA1, biotinylated anti-mouse, followed by AP  
518 conjugated streptavidin and Fast Red. Three different experiments with at least 4 embryos per  
519 treatment group. 2c) Dose-response study in top-treated embryos, the PGCs were  
520 immunochemically marked with antiSSEA1 and antimouse alexa 488 "in toto". Y-axis  
521 percentage of embryos in each treatment group. X-axis: AntiSSEA1 (-, 1/10, 1/100 and

immunosurgery PGCs

522 1/100)/Baby rabbit serum or C (- or + at 1/40) designed as -/-, -/+, 10/+, 100/+ and 1000/+.

523 Each group has at least three embryos.

524

525 **Figure 3. Subgerminally injected stage X embryos.** Days of embryo survival (3a) and  
526 Number of PGCs (3b). The PGCs were counted after sectioning of entire embryos, a total of  
527 3,900 tissue sections were immunostained and evaluated. 3a) Days of embryo survival after  
528 sequential injections of antiSSEA1 (- or + 1/100) and C (-, 1/100, 1/1K and 1/10K). Joint  
529 injection of antiSSEA1 and baby rabbit serum (cocktail), none of embryos were developed.  
530 3b) Number of PGCs, the maximum cytolytic activity was archived between antiSSEA1  
531 +/100-+/1K. The baby rabbit serum alone did not show any cytolytic action (-/1K).

532

533 **Figure 4. Histology of embryos treated with antiSSEA1 and baby rabbit serum. Top-**  
534 **dressed stage X embryos.** Sections of gonads from control and treated embryos (5-days). A  
535 and B Control embryo PBS treated, only PGCs are immunochemically marked with  
536 antiSSEA1, biotinylated anti-mouse, followed by AP conjugated streptavidin and Fast Red  
537 (AX200 and BX400). C and D treated embryo showing one red cell colony (orange arrow),  
538 very few PGCs were counted in all sections. A total of 2,400 tissue sections were  
539 immunostained and analyzed. Haematoxilin counterstaining (C X100 and D X200).

540

541 **Figure 5. In vivo dose-response study in stage X embryos top-treated.** The presence of  
542 PGCs was assessed by immunohistochemistry “in toto”. A control embryo only PGCs were  
543 stained. B and C, most of the PGCs are already in the gonads but some are in their way  
544 migrating from the aorta (C). D and D’ Nephros and gonads from an embryo treated with  
545 BRS (anti-SSEA1 -/C+). Leica MZIII. Embryos needed a permeabilization step (1%  
546 DMSO+0.1% triton X-100 in PBS overnight) and long periods of antibodies incubations

immunosurgery PGCs

547 (antiSSEA1 and Ig G donkey antimouse alexa 488, with 48 and 24 hours at room temperature,  
548 respectively). LG=left gonad, RG=right gonad and A=aorta. E) Histology of D embryo's  
549 gonads (grey circles), PGCs in the gonads are purple (PAS and Alcian blue positives).  
550 Embryo was Alcian Blue and PAS stained "in toto" and then sectioned (X100).

551

552 **Figure 6. Treated embryos from "in vivo" dose-response study in stage X embryos top-**  
553 **treated.** Embryo development did not progress beyond 6 days (HH 29). A B and C treated  
554 embryos with absence of PGCs. A B C and A', B', C' visible light and fluorescence.  
555 AntiSSEA1 immunocytochemistry was made "in toto" with antimouse alexa 488. Embryos  
556 evaluated under fluorescence stereoscope Leica MZIII. G=gonad N=nephros.

557

558 **Table 1. Embryos distribution of "early" and "late development" when the treatment**  
559 **was deposited to the dorsal side of epiblast at stage X.** "Early development" 24 hours after  
560 the application of the treatment, the embryo continues to advance. "Late development" at day  
561 fourth embryos with heartbeat and vascular tree well formed.

562

563 **Table 2. Results of dose-response study.** The treatment was sequentially deposited to the  
564 dorsal side of epiblast. The majority of the embryos overpassed day 4 of development or 22  
565 HH stage (Hamburger&Hamilton's classification). None embryo showed marked PGCs in the  
566 treated group antiSSEA1 100/C+.

567

568 **Table 3. Embryo distribution of "early" and "late development" after subgerminal**  
569 **injections in chicken embryos at stage X.** "Early development" 24 hours after the  
570 application of the treatment, the embryo continues to advance. "Late development" at day  
571 fourth embryos with heartbeat and vascular tree well formed.



immunosurgery PGCs

572

573

574 **Competing interests**

575 The authors declare no competing or financial interests.

576 **Role of the founding source**

577 This study was supported by the grant AGL 2009E06345–MICINN (Spain).

578
